# Supplementary material for: The Impact of IT-Based Healthcare Communication on Mammography Screening Utilization among Women in the United States: National Health Interview Survey (2011–2018)
Source: MDPI journal article supplement (doi:10.3390/ijerph191912737), 2022-10-05
Supplement: s1 [file s1]

## Supplemental Materials

### 1. Descriptive statistics

#### a. Health and health behavior factors

Most women in our sample had a usual source of care (93.49%) and seen or talked to a general doctor in the past 12 months (78.93%). Twenty two percent of them reported excellent health status.

**Table S1.** Descriptive statistics of the health and health behavior factors among women aged 40+, 2011-2018 (n=118,034).

| Variable                                           | Frequency (N) | Percentage (%) |
|----------------------------------------------------|---------------|----------------|
| Reported Health Status                             |               |                |
| Excellent                                          | 18,424        | 19.55          |
| Very good                                          | 29,026        | 30.80          |
| Good                                               | 28,452        | 30.19          |
| Fair                                               | 13,702        | 14.54          |
| Poor                                               | 4,630         | 4.91           |
| Usual Source of Care                               |               |                |
| Yes                                                | 87,549        | 93.49          |
| No                                                 | 6,095         | 6.51           |
| Seen/talked to a General Doctor                    |               |                |
| Yes                                                | 73,533        | 78.93          |
| No                                                 | 19,624        | 21.07          |
| Seen/talked to OB/GYN                              |               |                |
| Yes                                                | 27,553        | 29.60          |
| No                                                 | 65,539        | 70.40          |
| Doctor Recommendation for Mammography <sup>a</sup> |               |                |
| Yes                                                | 14,537        | 61.94          |
| No                                                 | 8,931         | 38.06          |
| Mammography Utilization (past 12 months)           |               |                |
| Yes                                                | 47,791        | 52.39          |
| No                                                 | 43,427        | 47.61          |

<sup>a</sup> Doctor Recommendation for Mammography: included only in 2015 analysis, (n=14,315).

b. IT-based healthcare strategies

About half of the women (49.61%) of the women reported using at least one IT-based healthcare communication strategy; forty-nine percent looked up health information on the internet, eight percent scheduled medical appointments on Internet, and ten percent communicated with a healthcare provider by email. As for the number of IT strategies used, fifty percent reported not to use any of the IT-based healthcare communication strategies and only four percent reported using the three strategies.

**Table S2.** Descriptive statistics of IT-based healthcare communication strategies variables among women aged 30+, 2011-2018 (n= 118,034).

| Variable                                                      | Frequency (n) | Percent (%) |
|---------------------------------------------------------------|---------------|-------------|
| <b>IT-based Healthcare Communication Strategies</b>           |               |             |
| <b>Q<sub>1</sub><sup>a</sup></b>                              |               |             |
| Yes                                                           | 42,156        | 45.38       |
| No                                                            | 50,741        | 54.62       |
| <b>Q<sub>2</sub><sup>b</sup></b>                              |               |             |
| Yes                                                           | 6,997         | 7.53        |
| No                                                            | 85,921        | 92.47       |
| <b>Q<sub>3</sub><sup>c</sup></b>                              |               |             |
| Yes                                                           | 9,094         | 9.79        |
| No                                                            | 83,820        | 90.21       |
| <b>Q<sub>4</sub><sup>d</sup></b>                              |               |             |
| Yes                                                           | 43,651        | 46.29       |
| No                                                            | 50,639        | 53.71       |
| <b>Number of IT-based Healthcare Communication Strategies</b> |               |             |
| 0                                                             | 50,639        | 53.71       |
| 1                                                             | 32,843        | 34.83       |
| 2                                                             | 7,020         | 7.45        |
| 3                                                             | 3,788         | 4.02        |

<sup>a</sup> Q<sub>1</sub>: Looked-up health information on the internet ("yes" versus "no", and "no" is the reference). <sup>b</sup> Q<sub>2</sub>: Scheduled medical appointment on the internet ("yes" versus "no", and "no" is the reference). <sup>c</sup> Q<sub>3</sub>: Communicated with healthcare provider by email ("yes" versus "no", and "no" is the reference). <sup>d</sup> Q<sub>4</sub>: Composite IT-based healthcare communication. This is coded as "Yes" if at least one condition in Q<sub>1</sub>- Q<sub>4</sub> were met and coded as "No" otherwise.

2. Association between Mammography Utilization and IT-based Healthcare Communication- Unadjusted Logistic Regressions

Based on the results from the univariable logistic regressions, the associations between the IT-based healthcare communication strategies and mammography screening utilization were statistically significant during the entire study period ( $p < 0.001$  in all years).

**Table S3.** Unadjusted logistic regression of mammography utilization based on IT-based healthcare communication. Unadjusted model 0 <sup>a</sup>.

| Mammography Utilization by time period | Odds Ratio | S.E. | P      | 95% Conf. Interval |      |
|----------------------------------------|------------|------|--------|--------------------|------|
| All years 2011-2018 (n= 94,290)        |            |      |        |                    |      |
| Q <sub>1</sub> <sup>b</sup>            | 1.66       | 0.02 | <0.001 | 1.62               | 1.71 |
| Q <sub>2</sub> <sup>c</sup>            | 1.87       | 0.05 | <0.001 | 1.77               | 1.97 |
| Q <sub>3</sub> <sup>d</sup>            | 2.00       | 0.05 | <0.001 | 1.91               | 2.10 |
| Q <sub>4</sub> <sup>e</sup>            | 1.72       | 0.01 | <0.001 | 1.68               | 1.77 |
| Year 2011 (n= 11,574)                  | 1.61       | 0.06 | <0.001 | 1.49               | 1.74 |
| Q <sub>1</sub> <sup>b</sup>            | 2.02       | 0.22 | <0.001 | 1.64               | 2.50 |
| Q <sub>2</sub> <sup>c</sup>            | 1.83       | 0.16 | <0.001 | 1.53               | 2.18 |
| Q <sub>3</sub> <sup>d</sup>            | 1.69       | 0.06 | <0.001 | 1.57               | 1.82 |
| Q <sub>4</sub> <sup>e</sup>            | 1.65       | 0.06 | <0.001 | 1.53               | 1.78 |
| Year 2012 (n= 12,306)                  | 2.26       | 0.24 | <0.001 | 1.83               | 2.78 |
| Q <sub>1</sub> <sup>b</sup>            | 2.11       | 0.19 | <0.001 | 1.77               | 2.52 |
| Q <sub>2</sub> <sup>c</sup>            | 1.69       | 0.06 | <0.001 | 1.57               | 1.83 |
| Q <sub>3</sub> <sup>d</sup>            | 1.63       | 0.06 | <0.001 | 1.52               | 1.76 |
| Q <sub>4</sub> <sup>e</sup>            | 1.88       | 0.15 | <0.001 | 1.60               | 2.21 |
| Year 2013 (n= 12,364)                  | 2.04       | 0.15 | <0.001 | 1.77               | 2.36 |
| Q <sub>1</sub> <sup>b</sup>            | 1.66       | 0.06 | <0.001 | 1.54               | 1.78 |
| Q <sub>2</sub> <sup>c</sup>            | 1.75       | 0.06 | <0.001 | 1.63               | 1.88 |
| Q <sub>3</sub> <sup>d</sup>            | 2.19       | 0.18 | <0.001 | 1.86               | 2.59 |
| Q <sub>4</sub> <sup>e</sup>            | 2.20       | 0.16 | <0.001 | 1.91               | 2.53 |
| Year 2014 (n= 13,436)                  | 1.82       | 0.06 | <0.001 | 1.70               | 1.95 |
| Q <sub>1</sub> <sup>b</sup>            | 1.65       | 0.06 | <0.001 | 1.54               | 1.77 |
| Q <sub>2</sub> <sup>c</sup>            | 1.86       | 0.13 | <0.001 | 1.63               | 2.13 |
| Q <sub>3</sub> <sup>d</sup>            | 1.93       | 0.11 | <0.001 | 1.71               | 2.17 |
| Q <sub>4</sub> <sup>e</sup>            | 1.74       | 0.06 | <0.001 | 1.62               | 1.87 |
| Year 2015 (n= 12,483)                  | 1.74       | 0.06 | <0.001 | 1.62               | 1.87 |
| Q <sub>1</sub> <sup>b</sup>            | 1.93       | 0.12 | <0.001 | 1.70               | 2.19 |
| Q <sub>2</sub> <sup>c</sup>            | 2.15       | 0.12 | <0.001 | 1.91               | 2.41 |
| Q <sub>3</sub> <sup>d</sup>            | 1.79       | 0.07 | <0.001 | 1.66               | 1.92 |
| Q <sub>4</sub> <sup>e</sup>            |            |      |        |                    |      |

|                              |      |      |        |      |      |
|------------------------------|------|------|--------|------|------|
| <b>Year 2017 (n= 10,099)</b> | 1.60 | 0.06 | <0.001 | 1.47 | 1.73 |
| Q <sub>1</sub> <sup>b</sup>  | 1.58 | 0.10 | <0.001 | 1.39 | 1.79 |
| Q <sub>2</sub> <sup>c</sup>  | 2.00 | 0.12 | <0.001 | 1.77 | 2.25 |
| Q <sub>3</sub> <sup>d</sup>  | 1.70 | 0.07 | <0.001 | 1.57 | 1.84 |
| Q <sub>4</sub> <sup>e</sup>  |      |      |        |      |      |
| <b>Year 2018 (n= 9,775)</b>  | 1.71 | 0.07 | <0.001 | 1.57 | 1.86 |
| Q <sub>1</sub> <sup>b</sup>  | 1.73 | 0.11 | <0.001 | 1.53 | 1.96 |
| Q <sub>2</sub> <sup>c</sup>  | 1.83 | 0.11 | <0.001 | 1.63 | 2.06 |
| Q <sub>4</sub> <sup>d</sup>  |      |      |        |      |      |
| Q <sub>5</sub> <sup>e</sup>  | 1.84 | 0.08 | <0.001 | 1.68 | 2.00 |

<sup>a</sup> Adjusted model 0: no control variables were included. <sup>b</sup> Q<sub>1</sub>: Looked-up health information on the internet ("yes" versus "no", and "no" is the reference). <sup>c</sup> Q<sub>2</sub>: Scheduled medical appointment on the internet ("yes" versus "no", and "no" is the reference). <sup>d</sup> Q<sub>3</sub>: Communicated with healthcare provider by email ("yes" versus "no", and "no" is the reference). <sup>e</sup> Q<sub>4</sub>: Composite IT-based healthcare communication. This is coded as "yes" if at least one condition in Q<sub>1</sub>-Q<sub>3</sub> were met and coded as "no" otherwise. "no" is the reference.

### 3. The Predicted Probability of Mammography Screening Utilization by the Number of IT-Based Healthcare Communication Strategies

The analysis showed a statistically significant linear trend in the probability of using mammography screening and the number of IT-based healthcare communication strategies ( $P < 0.001$ ).

**Table S4.** Linear Trend Analysis in the Probability of Using Mammography Screening based on the Number of IT Strategies.

| Number of IT Strategies (Linear) | df <sup>a</sup> | Chi <sup>2</sup> | P > Chi <sup>2</sup> |
|----------------------------------|-----------------|------------------|----------------------|
|                                  | 1               | 128.88           | <0.001               |

<sup>a</sup> df: Degree of freedom.

### 4. Crosstabulation across different ethnic groups

Among NH Whites, about 10% were from the lowest income level (<100%) and about 42% were from the highest level ( $\geq 400$ ). However, there were about 28% and 29% women in the lowest income level (<100%) and about 18% and 20% from the highest level ( $\geq 400$ ) among NH Blacks and Hispanics respectively.

**Table S5.** Percentages of the ratio of family income to the poverty threshold based on race/ethnicity for women 40+.

| Race/ethnicity        | Poverty ratio level |          |          |            | Total | P value <sup>a</sup> |
|-----------------------|---------------------|----------|----------|------------|-------|----------------------|
|                       | <100%               | 100-199% | 200-399% | $\geq 400$ |       |                      |
| Hispanic              | 28.86               | 28.66    | 24.71    | 17.77      | 100   | <0.001               |
| NH White <sup>b</sup> | 9.87                | 18.39    | 29.84    | 41.89      | 100   |                      |
| NH Black <sup>c</sup> | 27.73               | 25.61    | 26.12    | 20.54      | 100   |                      |
| Other                 | 17.63               | 19.06    | 24.88    | 38.44      | 100   |                      |
| Total                 | 15.23               | 20.73    | 28.38    | 35.66      | 100   |                      |

<sup>a</sup> P value based on Chi<sup>2</sup> test. <sup>b</sup> NH White: Non-Hispanic White. <sup>c</sup> NH Black: Non-Hispanic Black.

Around 12 % of NH White women in the sample had less than high school degree and about 30% had a Bachelor' or graduate degree. Among NH Black women, 24% had less than high school degree and 20% had a Bachelor' or graduate degree. Also, around 44% of Hispanic women had less than high school degree and 14% had a Bachelor' or graduate degree.

**Table S6.** Percentages of the education based on race/ethnicity for women 40+.

| Race/ethnicity        | Education             |             |                               |                   |                 | Total | P value <sup>a</sup> |
|-----------------------|-----------------------|-------------|-------------------------------|-------------------|-----------------|-------|----------------------|
|                       | Less than high school | High school | Some college/associate degree | Bachelor's degree | Graduate degree |       |                      |
| Hispanic              | 43.80                 | 19.49       | 22.40                         | 9.30              | 5.02            | 100   | <0.001               |
| NH White <sup>b</sup> | 11.90                 | 25.08       | 31.68                         | 18.72             | 12.61           | 100   |                      |

|                       |       |       |       |       |       |     |
|-----------------------|-------|-------|-------|-------|-------|-----|
| NH Black <sup>c</sup> | 24.00 | 24.40 | 31.54 | 12.01 | 8.05  | 100 |
| Other                 | 18.45 | 20.81 | 22.39 | 24.88 | 13.47 | 100 |
| Total                 | 17.88 | 24.05 | 29.98 | 16.99 | 11.10 | 100 |

<sup>a</sup> P value based on Chi2 test. <sup>b</sup> NH White: Non-Hispanic White. <sup>c</sup> NH Black: Non-Hispanic Black.

From the uninsured women in our sample, 30% were Hispanic. In other words, 20.4% of Hispanic women, 10% of NH black women, and 5.6% of NH White women were uninsured. Most of privately insured women in the sample were NH White (75.5%) followed by NH Black (11%), and Hispanic (8%). Insurance disparity could impact the variations in mammography screening utilization.

Table S7. Percentages of the ratio of family income to the poverty threshold based on race/ethnicity for women 40+.

| Race/ethnicity        | Insurance coverage |        |          |       |           | Total | P value <sup>a</sup> |
|-----------------------|--------------------|--------|----------|-------|-----------|-------|----------------------|
|                       | Private            | Public | Military | Other | Uninsured |       |                      |
| Hispanic              | 39.47              | 35.41  | 1.81     | 2.88  | 20.43     | 100   | <0.001               |
| NH White <sup>b</sup> | 66.58              | 22.92  | 3.90     | 0.99  | 5.61      | 100   |                      |
| NH Black <sup>c</sup> | 46.79              | 37.96  | 3.02     | 2.13  | 10.10     | 100   |                      |
| Other                 | 54.02              | 30.04  | 4.58     | 1.49  | 9.88      | 100   |                      |
| Total                 | 59.73              | 26.98  | 3.56     | 1.41  | 9.31      | 100   |                      |

<sup>a</sup> P value based on Chi2 test. <sup>b</sup> NH White: Non-Hispanic White. <sup>c</sup> NH Black: Non-Hispanic Black.

Among NH Whites, 4.20 % reported poor health status, 12% reported fair and 21.4 reported excellent. Among NH Blacks, 7.18 reported poor health status, 22.14% reported fair, and 13% reported excellent. Among Hispanics, 6.44% reported poor health status, 22.14% reported fair, 17% reported excellent.

Table S8. Percentages of the health status based on race/ethnicity for women 40+.

| Race/ethnicity        | Health status |       |       |           |           | Total | P value <sup>a</sup> |
|-----------------------|---------------|-------|-------|-----------|-----------|-------|----------------------|
|                       | Poor          | Fair  | Good  | Very good | Excellent |       |                      |
| Hispanic              | 6.44          | 20.47 | 32.37 | 23.85     | 16.88     | 100   | <0.001               |
| NH White <sup>b</sup> | 4.20          | 11.99 | 28.55 | 33.89     | 21.37     | 100   |                      |
| NH Black <sup>c</sup> | 7.18          | 22.14 | 34.36 | 23.40     | 12.93     | 100   |                      |
| Other                 | 4.55          | 13.42 | 34.53 | 27.46     | 20.04     | 100   |                      |
| Total                 | 4.91          | 14.54 | 30.19 | 30.80     | 19.55     | 100   |                      |

<sup>a</sup> P value based on Chi2 test. <sup>b</sup> NH White: Non-Hispanic White. <sup>c</sup> NH Black: Non-Hispanic Black.

## 5. Association between Mammography Utilization and IT-based Healthcare Communion- Adjusted Logistic Regressions- Model 1

Table S9 – Table S12 are provided to highlight the significance of education and income in Model 1.

*a. Looking-up health information on the internet (Q<sub>1</sub>)*

The results shows that more education and income are associated with higher mammography utilization. In general, with holding Q<sub>1</sub> constant, the odds of mammography utilization among women with bachelor's and graduate's degrees were 1.12 to 1.16 times the utilization of those with less than high school. The odds of mammography utilization among women with family income between 200%-399% of the poverty threshold were 1.14 times the utilization of those making less than 100% the poverty threshold, and the odds were much higher (1.40 times) among those making 400% or more the poverty threshold.

**Table S9.** Odds ratio and 95% CI based on multiple logistic regression for all years combined (2011-2018) showing all covariates (n= 94,290). Adjusted model 1 <sup>a</sup>.

| <b>Mammography Utilization</b>              | <b>Odds ratio</b> | <b>S.E.</b> | <b>P</b> | <b>95% Conf. Interval</b> |       |
|---------------------------------------------|-------------------|-------------|----------|---------------------------|-------|
| Q <sub>1</sub> <sup>b</sup> (Baseline: No)  |                   |             |          |                           |       |
| Yes                                         | 1.22              | 0.02        | <0.001   | 1.18                      | 1.27  |
| Age (Baseline: 40-44)                       |                   |             |          |                           |       |
| 45-49                                       | 1.66              | 0.05        | <0.001   | 1.55                      | 1.77  |
| 50-54                                       | 1.96              | 0.06        | <0.001   | 1.84                      | 2.08  |
| 55-59                                       | 2.30              | 0.07        | <0.001   | 2.17                      | 2.45  |
| 65+                                         | 2.50              | 0.06        | <0.001   | 2.64                      | 2.64  |
| Race/ethnicity (Baseline Hispanic)          |                   |             |          |                           |       |
| NH White <sup>c</sup>                       | 0.69              | 0.02        | <0.001   | 0.66                      | 0.73  |
| NH Black <sup>d</sup>                       | 0.98              | 0.03        | 0.590    | 0.92                      | 1.05  |
| Other                                       | 0.71              | 0.03        | <0.001   | 0.66                      | 0.77  |
| Marital status (Baseline: Married)          |                   |             |          |                           |       |
| Widowed                                     | 0.69              | 0.02        | <0.001   | 0.66                      | 0.73  |
| Divorced                                    | 0.90              | 0.02        | <0.001   | 0.86                      | 0.94  |
| Separated                                   | 0.86              | 0.04        | 0.001    | 0.79                      | 0.94  |
| Never Married                               | 0.87              | 0.03        | <0.001   | 0.83                      | 0.92  |
| Living with partner                         | 0.90              | 0.04        | 0.021    | 0.82                      | 0.98  |
| Region (Baseline: East)                     |                   |             |          |                           |       |
| Midwest                                     | 1.03              | 0.02        | 0.249    | 0.98                      | 1.08  |
| South                                       | 0.90              | 0.02        | <0.001   | 0.86                      | 0.94  |
| West                                        | 0.91              | 0.02        | <0.001   | 0.86                      | 0.95  |
| Insurance coverage (Baseline: Private)      |                   |             |          |                           |       |
| Public                                      | 0.91              | 0.02        | <0.001   | 0.87                      | 0.94  |
| Military                                    | 1.16              | 0.05        | <0.001   | 1.07                      | 1.26  |
| Other                                       | 1.06              | 0.07        | 0.343    | 0.93                      | 1.21  |
| Uninsured                                   | 0.50              | 0.02        | <0.001   | 0.47                      | 0.54  |
| Education (Baseline: Less than high school) |                   |             |          |                           |       |
| High school                                 | 1.04              | 0.03        | 0.103    | 0.99                      | 1.09  |
| Some college / Associate degree             | 1.04              | 0.03        | 0.099    | 0.99                      | 1.10  |
| Bachelor's degree                           | 1.12              | 0.03        | <0.001   | 1.06                      | 1.019 |

|                                                                   |      |      |        |      |      |
|-------------------------------------------------------------------|------|------|--------|------|------|
| Graduate degree                                                   | 1.16 | 0.04 | <0.001 | 1.08 | 1.24 |
| Ratio of family income to the poverty threshold (Baseline: <100%) |      |      |        |      |      |
| 100%-199%                                                         | 0.97 | 0.03 | 0.339  | 0.92 | 1.03 |
| 200%-399%                                                         | 1.14 | 0.03 | <0.001 | 1.08 | 1.21 |
| >=400%                                                            | 1.40 | 0.04 | <0.001 | 1.31 | 1.48 |
| Work status (Baseline: No)                                        |      |      |        |      |      |
| Yes                                                               | 1.07 | 0.02 | <0.001 | 1.03 | 1.11 |
| Place usually go when sick (Baseline: No)                         |      |      |        |      |      |
| Yes                                                               | 2.34 | 0.09 | <0.001 | 2.16 | 2.53 |
| Physical health status (Baseline: Poor)                           |      |      |        |      |      |
| fair                                                              | 1.16 | 0.05 | <0.001 | 1.07 | 1.26 |
| Good                                                              | 1.40 | 0.05 | <0.001 | 1.30 | 1.51 |
| Very good                                                         | 1.56 | 0.06 | <0.001 | 1.45 | 1.69 |
| Excellent                                                         | 1.59 | 0.06 | <0.001 | 1.47 | 1.72 |
| Seen/talked to a general doctor (Baseline: No)                    |      |      |        |      |      |
| Yes                                                               | 1.98 | 0.04 | <0.001 | 1.90 | 2.06 |
| Seen/talked to OB/GYN                                             |      |      |        |      |      |
| Yes                                                               | 3.50 | 0.06 | <0.001 | 3.37 | 3.63 |
| Year (Baseline: 2011)                                             |      |      |        |      |      |
| 2012                                                              | 1.12 | 0.03 | <0.001 | 1.05 | 1.19 |
| 2013                                                              | 0.76 | 0.02 | <0.001 | 0.71 | 0.81 |
| 2014                                                              | 0.97 | 0.03 | 0.263  | 0.91 | 1.02 |
| 2015                                                              | 0.69 | 0.02 | <0.001 | 0.65 | 0.74 |
| 2016                                                              | 0.98 | 0.03 | 0.563  | 0.92 | 1.04 |
| 2017                                                              | 0.94 | 0.03 | <0.001 | 0.88 | 1.00 |
| 2018                                                              | 0.88 | 0.03 | <0.001 | 0.82 | 0.94 |

<sup>a</sup> Adjusted model 1: adjusting for age, race/ethnicity, marital status, education, region, insurance coverage, work status, place usually go when sick, seen/talked to a general doctor, seen/talked to OB/GYN, ratio of family income to the poverty threshold, and physical health status. <sup>b</sup> Q<sub>1</sub>: Looked-up health information on the internet (“yes” versus “no”, and “no” is the reference). <sup>c</sup> NH White: Non-Hispanic White. <sup>d</sup> NH Black: Non-Hispanic Black.

*b. Scheduling medical appointments on the internet (Q<sub>2</sub>)*

With holding Q<sub>2</sub> constant, the increase in the odds of mammography among women with high school, associate, bachelor’s and graduate’s degrees ranged from 6% to 23% compared to those with less than high school. The odds of mammography utilization among women with family income between 200%-399% of the poverty threshold were 1.16 times the utilization of those making less than 100% the poverty threshold, and the odds were much higher (1.43 times) among those making 400% or more the poverty threshold.



**Table S10.** Odds ratio and 95% CI based on multiple logistic regression for all years combined (2011-2018) showing all covariates (n= 94,290). Adjusted model 1 <sup>a</sup>.

| <b>Mammography Utilization</b>                                    | <b>Odds ratio</b> | <b>S.E.</b> | <b>P</b> | <b>95% Conf. Interval</b> |      |
|-------------------------------------------------------------------|-------------------|-------------|----------|---------------------------|------|
| Q2 <sup>b</sup> (Baseline: No)                                    |                   |             |          |                           |      |
| Yes                                                               | 1.23              | 0.04        | <0.001   | 1.16                      | 1.30 |
| Age (Baseline: 40-44)                                             |                   |             |          |                           |      |
| 45-49                                                             | 1.66              | 0.05        | <0.001   | 1.55                      | 1.77 |
| 50-54                                                             | 1.95              | 0.06        | <0.001   | 1.83                      | 2.08 |
| 55-59                                                             | 2.30              | 0.07        | <0.001   | 2.16                      | 2.44 |
| 65+                                                               | 2.45              | 0.07        | <0.001   | 2.32                      | 2.59 |
| Race/ethnicity (Baseline Hispanic)                                |                   |             |          |                           |      |
| NH White <sup>c</sup>                                             | 0.72              | 0.02        | <0.001   | 0.068                     | 0.75 |
| NH Black <sup>d</sup>                                             | 0.99              | 0.03        | 0.629    | 0.93                      | 1.05 |
| Other                                                             | 0.71              | 0.03        | <0.001   | 0.66                      | 0.77 |
| Marital status (Baseline: Married)                                |                   |             |          |                           |      |
| Widowed                                                           | 0.68              | 0.01        | <0.001   | 0.65                      | 0.71 |
| Divorced                                                          | 0.90              | 0.02        | <0.001   | 0.87                      | 0.94 |
| Separated                                                         | 0.86              | 0.03        | 0.001    | 0.78                      | 0.94 |
| Never Married                                                     | 0.87              | 0.02        | <0.001   | 0.82                      | 0.92 |
| Living with partner                                               | 0.90              | 0.04        | 0.024    | 0.82                      | 0.99 |
| Region (Baseline: East)                                           |                   |             |          |                           |      |
| Midwest                                                           | 1.03              | 0.02        | 0.225    | 0.98                      | 1.08 |
| South                                                             | 0.90              | 0.02        | <0.001   | 0.86                      | 0.94 |
| West                                                              | 0.90              | 0.02        | <0.001   | 0.86                      | 0.95 |
| Insurance coverage (Baseline: Private)                            |                   |             |          |                           |      |
| Public                                                            | 0.91              | 0.02        | <0.001   | 0.87                      | 0.95 |
| Military                                                          | 1.16              | 0.05        | <0.001   | 1.07                      | 1.26 |
| Other                                                             | 1.07              | 0.07        | 0.319    | 0.94                      | 1.22 |
| Uninsured                                                         | 0.51              | 0.02        | <0.001   | 0.47                      | 0.54 |
| Education (Baseline: Less than high school)                       |                   |             |          |                           |      |
| High school                                                       | 1.06              | 0.03        | 0.020    | 1.01                      | 1.11 |
| Some college / Associate degree                                   | 1.09              | 0.03        | 0.001    | 1.04                      | 1.14 |
| Bachelor's degree                                                 | 1.19              | 0.03        | <0.001   | 1.12                      | 1.26 |
| Graduate degree                                                   | 1.23              | 0.04        | <0.001   | 1.15                      | 1.31 |
| Ratio of family income to the poverty threshold (Baseline: <100%) |                   |             |          |                           |      |
| 100%-199%                                                         | 0.98              | 0.02        | 0.438    | 0.93                      | 1.03 |
| 200%-399%                                                         | 1.16              | 0.03        | <0.001   | 1.10                      | 1.23 |
| >=400%                                                            | 1.43              | 0.04        | <0.001   | 1.34                      | 1.52 |
| Work status (Baseline: No)                                        |                   |             |          |                           |      |
| Yes                                                               | 1.08              | 0.02        | <0.001   | 1.04                      | 1.13 |
| Place usually go when sick (Baseline: No)                         |                   |             |          |                           |      |
| Yes                                                               | 2.33              | 0.09        | <0.001   | 2.16                      | 2.52 |
| Physical health status (Baseline: Poor)                           |                   |             |          |                           |      |
| fair                                                              | 1.17              | 0.05        | <0.001   | 1.08                      | 1.26 |
| Good                                                              | 1.40              | 0.05        | <0.001   | 1.30                      | 1.51 |
| Very good                                                         | 1.57              | 0.06        | <0.001   | 1.45                      | 1.70 |

|                                                |      |      |        |      |      |
|------------------------------------------------|------|------|--------|------|------|
| Excellent                                      | 1.59 | 0.06 | <0.001 | 1.47 | 1.72 |
| Seen/talked to a general doctor (Baseline: No) |      |      |        |      |      |
| Yes                                            | 1.99 | 0.04 | <0.001 | 1.91 | 2.07 |
| Seen/talked to OB/GYN                          |      |      |        |      |      |
| Yes                                            | 3.52 | 0.06 | <0.001 | 3.40 | 3.66 |
| Year (Baseline: 2011)                          |      |      |        |      |      |
| 2012                                           | 1.11 | 0.03 | 0.001  | 1.05 | 1.18 |
| 2013                                           | 0.76 | 0.02 | <0.001 | 0.72 | 0.81 |
| 2014                                           | 0.96 | 0.03 | 0.188  | 0.91 | 1.02 |
| 2015                                           | 0.69 | 0.02 | <0.001 | 0.65 | 0.74 |
| 2016                                           | 0.98 | 0.03 | 0.541  | 0.92 | 1.04 |
| 2017                                           | 0.94 | 0.03 | 0.071  | 0.89 | 1.00 |
| 2018                                           | 0.88 | 0.03 | <0.001 | 0.82 | 0.94 |

<sup>a</sup> Adjusted model 1: adjusting for age, race/ethnicity, marital status, education, region, insurance coverage, work status, place usually go when sick, seen/talked to a general doctor, seen/talked to OB/GYN, ratio of family income to the poverty threshold, and physical health status. <sup>b</sup> Q<sub>2</sub>: Scheduled medical appointment on the internet (“yes” versus “no”, and “no” is the reference). <sup>c</sup> NH White: Non-Hispanic White. <sup>d</sup> NH Black: Non-Hispanic Black.

c. Communicated with healthcare provider using Email (Q<sub>3</sub>)

With holding Q<sub>3</sub> constant, the increase in the odds of mammography among women with high school, associate, bachelor’s and graduate’s degrees were 6%, 8%, 18% and 20% compared to those with less than high school. The odds of mammography utilization among women with family income between 200%-399% of the poverty threshold were 1.16 times the utilization of those making less than 100% the poverty threshold, and the odds were much higher (1.42 times) among those making 400% or more the poverty threshold.

**Table S11.** Odds ratio and 95% CI based on multiple logistic regression for all years combined (2011-2018) showing all covariates (n= 94,290). Adjusted model 1 <sup>a</sup>.

| Mammography Utilization                    | Odds ratio | S.E. | P      | 95% Conf. Interval |      |
|--------------------------------------------|------------|------|--------|--------------------|------|
| Q <sub>3</sub> <sup>b</sup> (Baseline: No) |            |      |        |                    |      |
| Yes                                        | 1.33       | 0.03 | <0.001 | 1.26               | 1.40 |
| Age (Baseline: 40-44)                      |            |      |        |                    |      |
| 45-49                                      | 1.66       | 0.06 | <0.001 | 1.55               | 1.77 |
| 50-54                                      | 1.96       | 0.06 | <0.001 | 1.84               | 2.08 |
| 55-59                                      | 2.29       | 0.07 | <0.001 | 2.15               | 2.44 |
| 65+                                        | 2.45       | 0.07 | <0.001 | 2.32               | 2.59 |
| Race/ethnicity (Baseline Hispanic)         |            |      |        |                    |      |
| NH White <sup>c</sup>                      | 0.71       | 0.02 | <0.001 | 0.67               | 0.75 |
| NH Black <sup>d</sup>                      | 0.98       | 0.03 | 0.640  | 0.92               | 1.05 |
| Other                                      | 0.71       | 0.03 | <0.001 | 0.66               | 0.77 |
| Marital status (Baseline: Married)         |            |      |        |                    |      |
| Widowed                                    | 0.68       | 0.01 | <0.001 | 0.65               | 0.71 |
| Divorced                                   | 0.90       | 0.02 | <0.001 | 0.86               | 0.94 |

|                                                                   |      |      |        |      |      |
|-------------------------------------------------------------------|------|------|--------|------|------|
| Separated                                                         | 0.86 | 0.04 | 0.001  | 0.78 | 0.94 |
| Never Married                                                     | 0.86 | 0.02 | <0.001 | 0.82 | 0.91 |
| Living with partner                                               | 0.90 | 0.04 | 0.022  | 0.82 | 0.98 |
| Region (Baseline: East)                                           |      |      |        |      |      |
| Midwest                                                           | 1.03 | 0.02 | 0.265  | 0.98 | 1.08 |
| South                                                             | 0.90 | 0.02 | <0.001 | 0.86 | 0.94 |
| West                                                              | 0.90 | 0.02 | <0.001 | 0.85 | 0.94 |
| Insurance coverage (Baseline: Private)                            |      |      |        |      |      |
| Public                                                            | 0.91 | 0.02 | <0.001 | 0.87 | 0.95 |
| Military                                                          | 1.16 | 0.05 | <0.001 | 1.07 | 1.26 |
| Other                                                             | 1.07 | 0.07 | 0.326  | 0.94 | 1.21 |
| Uninsured                                                         | 0.51 | 0.02 | <0.001 | 0.47 | 0.54 |
| Education (Baseline: Less than high school)                       |      |      |        |      |      |
| High school                                                       | 1.06 | 0.03 | 0.021  | 1.01 | 1.11 |
| Some college / Associate degree                                   | 1.08 | 0.03 | 0.001  | 1.03 | 1.14 |
| Bachelor's degree                                                 | 1.18 | 0.03 | <0.001 | 1.11 | 1.25 |
| Graduate degree                                                   | 1.20 | 0.04 | <0.001 | 1.13 | 1.29 |
| Ratio of family income to the poverty threshold (Baseline: <100%) |      |      |        |      |      |
| 100%-199%                                                         | 0.98 | 0.03 | 0.430  | 0.93 | 1.03 |
| 200%-399%                                                         | 1.16 | 0.03 | <0.001 | 1.10 | 1.22 |
| >=400%                                                            | 1.42 | 0.04 | <0.001 | 1.33 | 1.51 |
| Work status (Baseline: No)                                        |      |      |        |      |      |
| Yes                                                               | 1.08 | 0.02 | <0.001 | 1.04 | 1.12 |
| Place usually go when sick (Baseline: No)                         |      |      |        |      |      |
| Yes                                                               | 2.32 | 0.09 | <0.001 | 2.15 | 2.51 |
| Physical health status (Baseline: Poor)                           |      |      |        |      |      |
| fair                                                              | 1.16 | 0.05 | <0.001 | 1.08 | 1.26 |
| Good                                                              | 1.40 | 0.05 | <0.001 | 1.30 | 1.51 |
| Very good                                                         | 1.57 | 0.06 | <0.001 | 1.45 | 1.70 |
| Excellent                                                         | 1.59 | 0.06 | <0.001 | 1.47 | 1.73 |
| Seen/talked to a general doctor (Baseline: No)                    |      |      |        |      |      |
| Yes                                                               | 1.98 | 0.04 | <0.001 | 1.90 | 2.06 |
| Seen/talked to OB/GYN                                             |      |      |        |      |      |
| Yes                                                               | 3.52 | 0.07 | <0.001 | 3.39 | 3.65 |
| Year (Baseline: 2011)                                             |      |      |        |      |      |
| 2012                                                              | 1.11 | 0.03 | 0.001  | 1.05 | 1.18 |
| 2013                                                              | 0.76 | 0.02 | <0.001 | 0.71 | 0.81 |
| 2014                                                              | 0.96 | 0.03 | 0.152  | 0.90 | 1.01 |
| 2015                                                              | 0.69 | 0.02 | <0.001 | 0.65 | 0.73 |
| 2016                                                              | 0.97 | 0.03 | 0.404  | 0.92 | 1.03 |
| 2017                                                              | 0.93 | 0.03 | 0.038  | 0.88 | 0.10 |
| 2018                                                              | 0.87 | 0.03 | <0.001 | 0.81 | 0.93 |

<sup>a</sup> Adjusted model 1: adjusting for age, race/ethnicity, marital status, education, region, insurance coverage, work status, place usually go when sick, seen/talked to a general doctor, seen/talked to OB/GYN, ratio of family income to the poverty threshold, and physical health status. <sup>b</sup> Q3: Communicated with healthcare provider by email ("yes")

versus “no”, and “no” is the reference). <sup>c</sup> NH White: Non-Hispanic White. <sup>d</sup> NH Black: Non-Hispanic Black.

*d. Composite IT-based healthcare communication (Q<sub>4</sub>)*

With holding Q<sub>4</sub> constant, the odds of mammography utilization among women with bachelor’s and graduate’s degrees were 1.11 to 1.14 times the utilization of those with less than high school. The odds of mammography utilization among women with family income between 200%-399% of the poverty threshold were 1.14 times the utilization of those making less than 100% the poverty threshold, and the odds were much higher (1.39 times) among those making 400% or more the poverty threshold. We are making more explicit in the manuscript that our results hold after controlling for education and income, and we now also highlight the statistically significant association of those two variables with mammography utilization.

**Table S12.** Odds ratio and 95% CI based on multiple logistic regression for all years combined (2011-2018) showing all covariates (n= 94,290). Adjusted model 1 <sup>a</sup>.

| <b>Mammography Utilization</b>              | <b>Odds ratio</b> | <b>S.E.</b> | <b>P</b> | <b>95% Conf. Interval</b> |      |
|---------------------------------------------|-------------------|-------------|----------|---------------------------|------|
| Q <sub>4</sub> <sup>b</sup> (Baseline: No)  |                   |             |          |                           |      |
| Yes                                         | 1.27              | 0.02        | <0.001   | 1.23                      | 1.32 |
| Age (Baseline: 40-44)                       |                   |             |          |                           |      |
| 45-49                                       | 1.66              | 0.06        | <0.001   | 1.55                      | 1.77 |
| 50-54                                       | 1.96              | 0.06        | <0.001   | 1.85                      | 2.09 |
| 55-59                                       | 2.31              | 0.07        | <0.001   | 2.17                      | 2.46 |
| 65+                                         | 2.52              | 0.07        | <0.001   | 2.39                      | 2.67 |
| Race/ethnicity (Baseline Hispanic)          |                   |             |          |                           |      |
| NH White <sup>c</sup>                       | 0.69              | 0.02        | <0.001   | 0.65                      | 0.73 |
| NH Black <sup>d</sup>                       | 0.98              | 0.03        | 0.592    | 0.92                      | 1.05 |
| Other                                       | 0.72              | 0.03        | <0.001   | 0.66                      | 0.77 |
| Marital status (Baseline: Married)          |                   |             |          |                           |      |
| Widowed                                     | 0.70              | 0.02        | <0.001   | 0.67                      | 0.73 |
| Divorced                                    | 0.90              | 0.02        | <0.001   | 0.86                      | 0.94 |
| Separated                                   | 0.86              | 0.04        | 0.001    | 0.78                      | 0.94 |
| Never Married                               | 0.87              | 0.02        | <0.001   | 0.83                      | 0.92 |
| Living with partner                         | 0.90              | 0.04        | 0.021    | 0.82                      | 0.98 |
| Region (Baseline: East)                     |                   |             |          |                           |      |
| Midwest                                     | 1.03              | 0.02        | 0.267    | 0.98                      | 1.08 |
| South                                       | 0.90              | 0.02        | <0.001   | 0.86                      | 0.94 |
| West                                        | 0.90              | 0.02        | <0.001   | 0.86                      | 0.95 |
| Insurance coverage (Baseline: Private)      |                   |             |          |                           |      |
| Public                                      | 0.91              | 0.02        | <0.001   | 0.87                      | 0.95 |
| Military                                    | 1.16              | 0.05        | <0.001   | 1.07                      | 1.26 |
| Other                                       | 1.07              | 0.07        | 0.328    | 0.94                      | 1.21 |
| Uninsured                                   | 0.50              | 0.02        | <0.001   | 0.47                      | 0.54 |
| Education (Baseline: Less than high school) |                   |             |          |                           |      |
| High school                                 | 1.04              | 0.03        | 0.139    | 0.99                      | 1.09 |

|                                                                   |      |      |        |      |      |
|-------------------------------------------------------------------|------|------|--------|------|------|
| Some college / Associate degree                                   | 1.03 | 0.03 | 0.251  | 0.98 | 1.08 |
| Bachelor's degree                                                 | 1.11 | 0.03 | 0.001  | 1.04 | 1.18 |
| Graduate degree                                                   | 1.14 | 0.04 | <0.001 | 1.06 | 1.22 |
| Ratio of family income to the poverty threshold (Baseline: <100%) |      |      |        |      |      |
| 100%-199%                                                         | 0.97 | 0.03 | 0.323  | 0.92 | 1.03 |
| 200%-399%                                                         | 1.14 | 0.03 | <0.001 | 1.07 | 1.20 |
| >=400%                                                            | 1.38 | 0.04 | <0.001 | 1.30 | 1.47 |
| Work status (Baseline: No)                                        |      |      |        |      |      |
| Yes                                                               | 1.07 | 0.02 | 0.001  | 1.03 | 1.11 |
| Place usually go when sick (Baseline: No)                         |      |      |        |      |      |
| Yes                                                               | 2.33 | 0.09 | <0.001 | 2.16 | 2.52 |
| Physical health status (Baseline: Poor)                           |      |      |        |      |      |
| fair                                                              | 1.16 | 0.05 | <0.001 | 1.08 | 1.26 |
| Good                                                              | 1.40 | 0.05 | <0.001 | 1.30 | 1.51 |
| Very good                                                         | 1.56 | 0.06 | <0.001 | 1.45 | 1.69 |
| Excellent                                                         | 1.59 | 0.07 | <0.001 | 1.47 | 1.72 |
| Seen/talked to a general doctor (Baseline: No)                    |      |      |        |      |      |
| Yes                                                               | 1.97 | 0.04 | <0.001 | 1.89 | 2.05 |
| Seen/talked to OB/GYN                                             |      |      |        |      |      |
| Yes                                                               | 3.49 | 0.06 | <0.001 | 3.36 | 3.62 |
| Year (Baseline: 2011)                                             |      |      |        |      |      |
| 2012                                                              | 1.11 | 0.03 | <0.001 | 1.05 | 1.18 |
| 2013                                                              | 0.76 | 0.02 | <0.001 | 0.71 | 0.80 |
| 2014                                                              | 0.96 | 0.03 | 0.223  | 0.91 | 1.02 |
| 2015                                                              | 0.69 | 0.02 | <0.001 | 0.64 | 0.73 |
| 2016                                                              | 0.97 | 0.03 | 0.417  | 0.91 | 1.03 |
| 2017                                                              | 0.93 | 0.03 | 0.033  | 0.88 | 0.99 |
| 2018                                                              | 0.87 | 0.03 | <0.001 | 0.81 | 0.93 |

<sup>a</sup> Adjusted model 1: adjusting for age, race/ethnicity, marital status, education, region, insurance coverage, work status, place usually go when sick, seen/talked to a general doctor, seen/talked to OB/GYN, ratio of family income to the poverty threshold, and physical health status. <sup>b</sup> Q4: Composite IT-based healthcare communication. This is coded as “yes” if at least one condition in Q1-Q4 were met and coded as “no” otherwise. “no” is the reference. <sup>c</sup> NH White: Non-Hispanic White. <sup>d</sup> NH Black: Non-Hispanic Black.

## 6. Directed Acyclic Graphs

The confounding variable must influence both the exposure and the outcome.

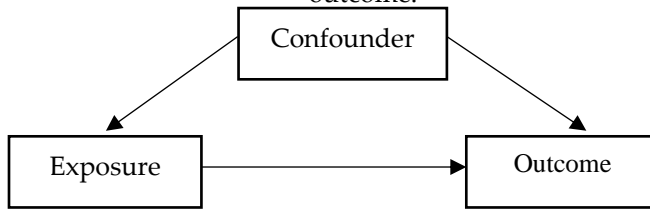

Figure S1. Confounding Variable

The mediator variable explains the relationship between the dependent variable and the independent variable

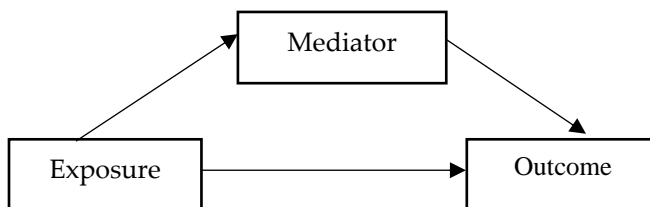

Figure S2. Mediator Variable
